# Supplementary material for: Potent but transient immunosuppression of T-cells is a general feature of CD71+ erythroid cells
Source: PubMed Central journal article supplement (PMC8664950; doi:10.1038/s42003-021-02914-4), 2021-12-10
Supplement: 42003_2021_2914_MOESM3_ESM.pdf [file 42003_2021_2914_MOESM3_ESM.pdf]

## Description of Additional Supplementary Files

**File name:** Supplementary Data 1.

**Description:** Individual clinical data of anemic and non-anemic patients.

**File name:** Supplementary Data 2.

**Description:** Source data for main manuscript and supplementary information graphs and charts together with scans of the original uncropped gels and blots.
